# Supplementary material for: Analysis of steroid hormones in human saliva by matrix-assisted laser desorption/ionization mass spectrometry
Source: Royal Society of Chemistry journal article supplement (doi:10.1039/c4ay01897d), 2014-11-10
Supplement: c4ay01897d1.pdf [file c4ay01897d1.pdf]

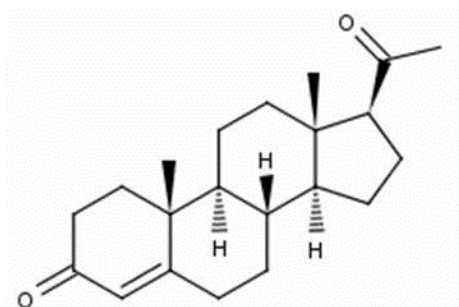

Progesterone  
MW : 314.46

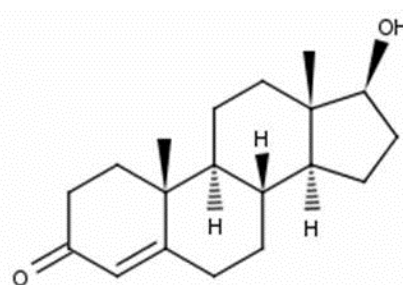

Testosterone  
MW : 288.42

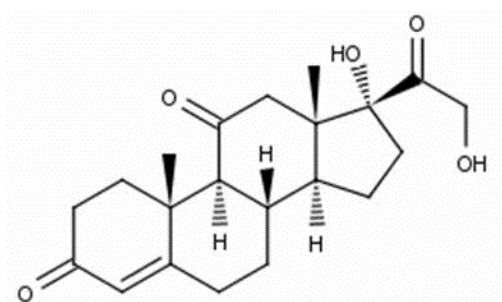

Cortisone  
MW : 360.44

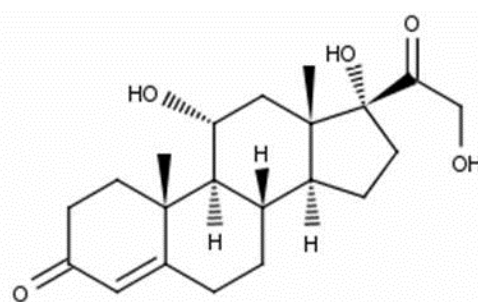

Hydrocortisone  
MW : 362.44

**Fig. S1.** The chemical structures of four steroid hormones.

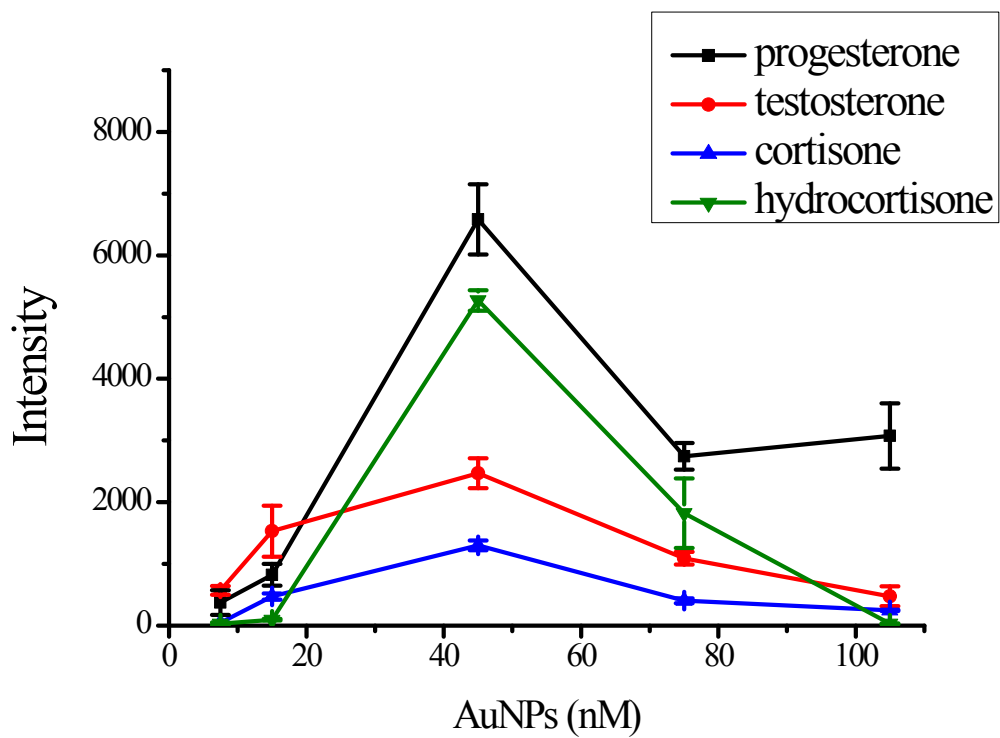

**Fig. S2.** The signal intensities of the four steroid hormones at various concentrations (7.5, 15, 45, 75 and 105 nM) of AuNPs and 20.62  $\mu$ J of laser fluence. (error bar, n=3)

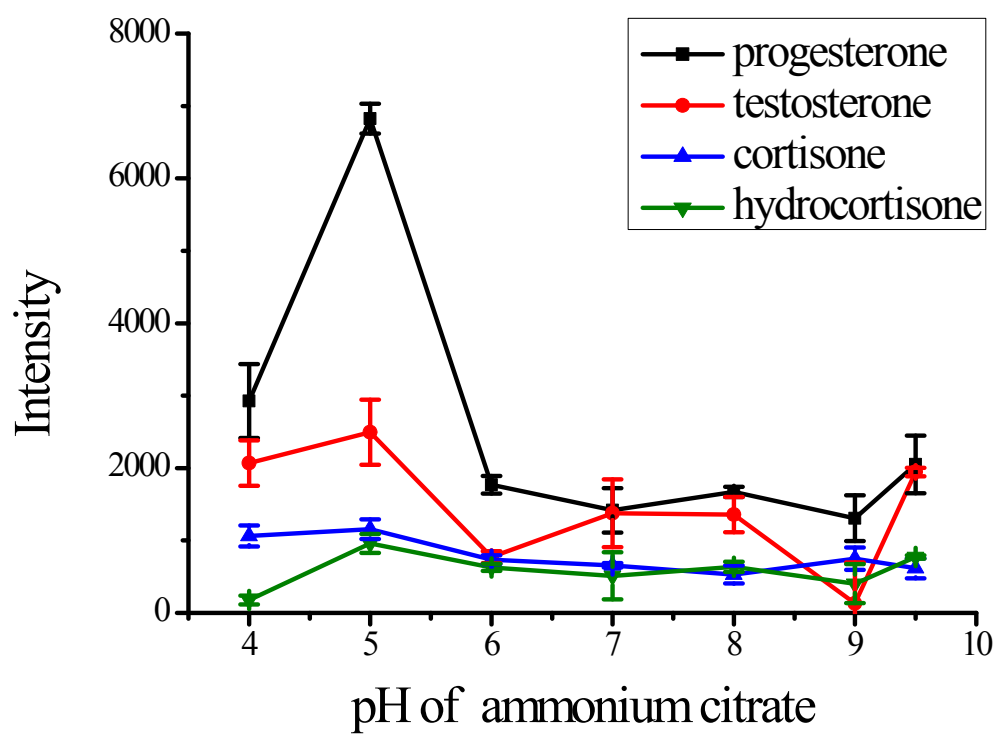

Fig. S3 The signal intensity of four steroid hormones at different pH.

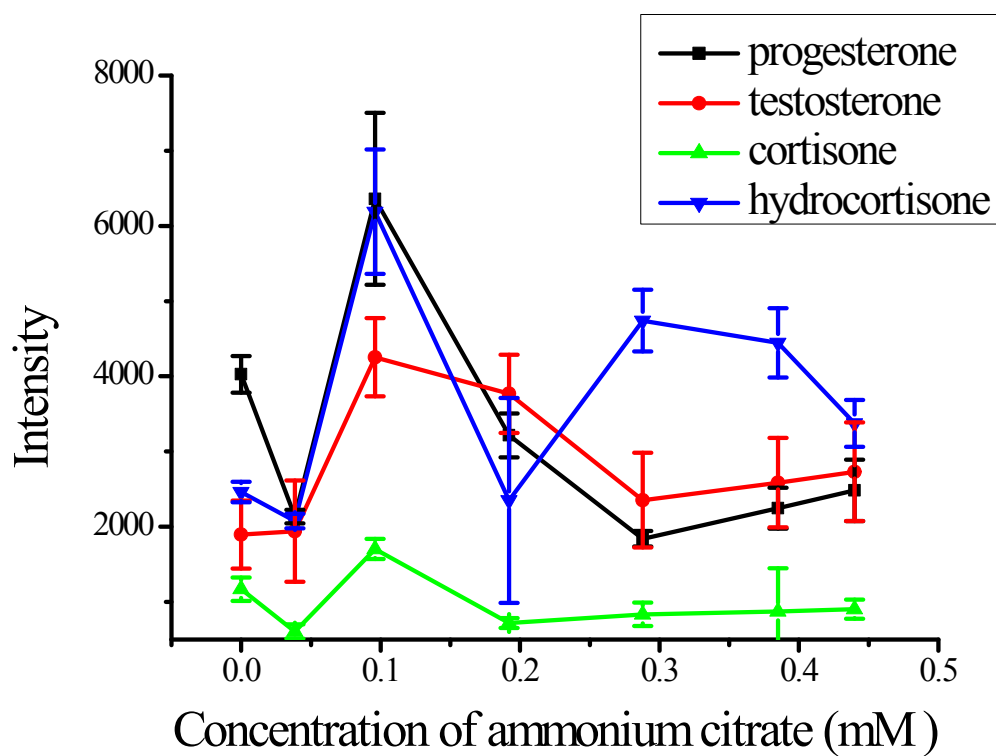

Fig. S4 The signal intensity of four steroid hormones at different buffer concentration in pH5.
